# Supplementary material
Source: PubMed Central journal article supplement (PMC4362781)
Supplement: NIHMS616705-supplement-Supplemental_Data_File.pdf [file NIHMS616705-supplement-Supplemental_Data_File.pdf]

---

**Supplemental Digital Content 1.** International Classification of Diseases Procedure Codes Used to Define Operative Cohorts

---

| <b>Operative Cohort</b>            | <b>ICD-9CM<br/>Procedure<br/>Code</b> | <b>Description</b>                                             |
|------------------------------------|---------------------------------------|----------------------------------------------------------------|
| Colectomy                          | 45.71                                 | Open and other multiple segmental resection of large intestine |
|                                    | 45.73                                 | Open and other RIGHT hemicolectomy                             |
|                                    | 45.74                                 | Open and other TRANSVERSE colectomy                            |
|                                    | 45.75                                 | Open and other LEFT hemicolectomy                              |
|                                    | 45.76                                 | Open and other sigmoidectomy                                   |
|                                    | 45.79                                 | Other and unspecified partial excision of large intestine      |
|                                    | 45.82                                 | Open total intra-abdominal colectomy                           |
|                                    | 45.83                                 | Other and unspecified total intra-abdominal colectomy          |
| Lung Resection                     | 32.3                                  | Thoracoscopic segmental resection of lung                      |
|                                    | 32.39                                 | Other and unspecified segmental resection of lung              |
|                                    | 32.41                                 | Thoracoscopic lobectomy                                        |
|                                    | 32.49                                 | Other lobectomy of lung                                        |
|                                    | 32.5                                  | Thoracoscopic pneumonectomy                                    |
|                                    | 32.59                                 | Other pneumonectomy                                            |
| Coronary Artery<br>Bypass Grafting | 36.1                                  | Aortocoronary bypass NOS                                       |
|                                    | 36.11                                 | Aortocoronary bypass 1-artery                                  |
|                                    | 36.12                                 | Aortocoronary bypass 2-artery                                  |
|                                    | 36.13                                 | Aortocoronary bypass 3-artery                                  |
|                                    | 36.14                                 | Aortocoronary bypass 4-artery                                  |
|                                    | 36.15                                 | 1 internal mammary CABG                                        |
|                                    | 36.16                                 | 2 internal mammary CABG                                        |
|                                    | 36.17                                 | Abdominal-coronary artery bypass                               |
|                                    | 36.19                                 | Heart revasc bypass anast necrosis                             |

---
