# Supplementary material
Source: PubMed Central journal article supplement (PMC4362781)
Supplement: NIHMS616705-supplement-Supplemental_Data_File_2.pdf [file NIHMS616705-supplement-Supplemental_Data_File_2.pdf]

**Supplemental Digital Content 2. International Classification of Diseases Codes Used to Define Post-Operative Complications**

| Postoperative Complication       | ICD-9 Code Type                                                             | Code                                                        | Description                                                                                                                                                                               |                          |
|----------------------------------|-----------------------------------------------------------------------------|-------------------------------------------------------------|-------------------------------------------------------------------------------------------------------------------------------------------------------------------------------------------|--------------------------|
| <b>Pulmonary Failure</b>         | <i>Diagnostic</i>                                                           | 518.81                                                      | Acute respiratory failure                                                                                                                                                                 |                          |
|                                  |                                                                             | 518.82                                                      | Other pulmonary insufficiency, NOS                                                                                                                                                        |                          |
|                                  |                                                                             | 518.84                                                      | Acute on chronic respiratory failure                                                                                                                                                      |                          |
|                                  |                                                                             | 96.04                                                       | Nonoperative insertion of endotracheal tube                                                                                                                                               |                          |
|                                  |                                                                             | 96.05                                                       | Nonoperative other intubation of respiratory tract                                                                                                                                        |                          |
|                                  | <i>Procedure</i>                                                            | 96.7                                                        | Continuous invasive mechanical ventilation of unspecified duration                                                                                                                        |                          |
|                                  |                                                                             | 96.71                                                       | Continuous invasive mechanical ventilation for less than 96 consecutive hours                                                                                                             |                          |
|                                  |                                                                             | 96.72                                                       | Continuous invasive mechanical ventilation for 96 consecutive hours or more                                                                                                               |                          |
|                                  |                                                                             | 518.5                                                       | Pulmonary insufficiency following trauma and surgery                                                                                                                                      |                          |
|                                  |                                                                             |                                                             |                                                                                                                                                                                           |                          |
| <b>Pneumonia</b>                 | <i>Diagnostic</i>                                                           | 481                                                         | Pneumococcal pneumonia (s. pneumoniae)                                                                                                                                                    |                          |
|                                  |                                                                             | 482                                                         | Pneumonia (Klebsiella pneumoniae)                                                                                                                                                         |                          |
|                                  |                                                                             | 482.1                                                       | Pneumonia (Pseudomonas)                                                                                                                                                                   |                          |
|                                  |                                                                             | 482.2                                                       | Pneumonia (H. influenzae)                                                                                                                                                                 |                          |
|                                  |                                                                             | 482.3                                                       | Pneumonia Streptococcus (other than s. pneumoniae)                                                                                                                                        |                          |
|                                  |                                                                             | 482.4                                                       | Pneumonia due to Staphylococcus                                                                                                                                                           |                          |
|                                  |                                                                             | 482.8                                                       | Pneumonia due to other specified bacteria                                                                                                                                                 |                          |
|                                  |                                                                             | 482.9                                                       | Bacterial pneumonia, NOS                                                                                                                                                                  |                          |
|                                  |                                                                             | 483                                                         | Mycoplasma pneumoniae                                                                                                                                                                     |                          |
|                                  |                                                                             | 483.1                                                       | Chlamydia                                                                                                                                                                                 |                          |
|                                  |                                                                             | 483.8                                                       | Pneumonia, other specified organism                                                                                                                                                       |                          |
|                                  |                                                                             | 484.1                                                       | Pneumonia in cytomegalic inclusion disease                                                                                                                                                |                          |
|                                  |                                                                             | 484.3                                                       | Pneumonia in whooping cough                                                                                                                                                               |                          |
|                                  |                                                                             | 484.5                                                       | Pneumonia in anthrax                                                                                                                                                                      |                          |
|                                  |                                                                             | 484.6                                                       | Pneumonia in aspergillosis                                                                                                                                                                |                          |
|                                  |                                                                             | 484.7                                                       | Pneumonia in other systemic mycoses                                                                                                                                                       |                          |
|                                  | 484.8                                                                       | Pneumonia in other infectious diseases classified elsewhere |                                                                                                                                                                                           |                          |
|                                  | 485                                                                         | Bronchopneumonia, organism unspecified                      |                                                                                                                                                                                           |                          |
|                                  | 507                                                                         | Due to inhalation of food or vomitus (aspiration pneumonia) |                                                                                                                                                                                           |                          |
|                                  | 507.1                                                                       | Due to inhalation of oils and essences                      |                                                                                                                                                                                           |                          |
|                                  | 507.8                                                                       | Due to other solids and liquids                             |                                                                                                                                                                                           |                          |
|                                  | <b>Myocardial Infarction</b>                                                | <i>Diagnostic</i>                                           | 410                                                                                                                                                                                       | AMI, anterolateral wall  |
|                                  |                                                                             |                                                             | 410.1                                                                                                                                                                                     | AMI, other anterior wall |
| 410.2                            |                                                                             |                                                             | AMI, inferolateral wall                                                                                                                                                                   |                          |
| 410.3                            |                                                                             |                                                             | AMI, inferoposterior wall                                                                                                                                                                 |                          |
| 410.4                            |                                                                             |                                                             | AMI, other inferior wall                                                                                                                                                                  |                          |
| 410.5                            |                                                                             |                                                             | AMI, other lateral wall                                                                                                                                                                   |                          |
| 410.6                            |                                                                             |                                                             | True posterior wall infarction                                                                                                                                                            |                          |
| 410.7                            |                                                                             |                                                             | Subendocardial infarction                                                                                                                                                                 |                          |
| 410.8                            |                                                                             |                                                             | AMI, other specified sites (e.g. atrium, papillary muscle)                                                                                                                                |                          |
| 410.9                            |                                                                             |                                                             | AMI, NOS                                                                                                                                                                                  |                          |
| <b>Venous Thromboembolism</b>    | <i>Diagnostic</i>                                                           | 415.1                                                       | PE and infarction                                                                                                                                                                         |                          |
|                                  |                                                                             | 415.11                                                      | Latrogenic PE and infarction                                                                                                                                                              |                          |
|                                  |                                                                             | 415.12                                                      | Septic PE                                                                                                                                                                                 |                          |
|                                  |                                                                             | 415.19                                                      | Other                                                                                                                                                                                     |                          |
|                                  |                                                                             | 451.11                                                      | Phlebitis and thrombophlebitis of the femoral vein                                                                                                                                        |                          |
|                                  |                                                                             | 451.19                                                      | Other phlebitis and thrombophlebitis of the femoropopliteal, popliteal, or tibial veins                                                                                                   |                          |
|                                  |                                                                             | 451.2                                                       | Phlebitis and thrombophlebitis of lower extremities, unspecified                                                                                                                          |                          |
|                                  |                                                                             | 451.81                                                      | Phlebitis and thrombophlebitis of Iliac Vein                                                                                                                                              |                          |
|                                  |                                                                             | 453.8                                                       | Venous embolism and thrombosis of other specified veins                                                                                                                                   |                          |
|                                  |                                                                             | 38.7                                                        | Interruption of the vena cava (e.g. Insertion of implant or sieve in vena cava)                                                                                                           |                          |
| <b>Acute Renal Failure</b>       | <i>Diagnostic</i>                                                           |                                                             | Acute renal failure (Excludes: following labor and delivery [669.3], posttraumatic [958.5], 584 that complicating: abortion [634-638 with .3, 639.3], ectopic or molar pregnancy [639.3]) |                          |
|                                  |                                                                             | 584.5                                                       | ARF with lesion of tubular necrosis                                                                                                                                                       |                          |
|                                  |                                                                             | 584.6                                                       | ARF with lesion of renal cortical necrosis                                                                                                                                                |                          |
|                                  |                                                                             | 584.7                                                       | ARF with lesion of renal medullary [papillary] necrosis                                                                                                                                   |                          |
|                                  |                                                                             | 584.8                                                       | ARF with other specified pathological lesion in kidney                                                                                                                                    |                          |
|                                  |                                                                             | 584.9                                                       | ARF, NOS                                                                                                                                                                                  |                          |
| <b>Post-operative Hemorrhage</b> | <i>Diagnostic</i>                                                           | 998.1                                                       | Hemorrhage or hematoma or seroma complicating a procedure                                                                                                                                 |                          |
|                                  |                                                                             | 998.11                                                      | Hemorrhage complicating a procedure                                                                                                                                                       |                          |
| <b>Surgical Site Infection</b>   | <i>Diagnostic</i>                                                           | 998.3                                                       | Posttraumatic wound infection, NOS                                                                                                                                                        |                          |
|                                  |                                                                             | 998.3                                                       | Disruption of wound, NOS                                                                                                                                                                  |                          |
|                                  |                                                                             |                                                             | Disruption of internal operation (surgical) wound (e.g. dehiscence of fascial closure or muscle flap)                                                                                     |                          |
|                                  |                                                                             |                                                             | Disruption of external operation (surgical) wound (Disruption or dehiscence of closure of skin, subcutaneous tissue)                                                                      |                          |
|                                  |                                                                             | 998.32                                                      | skin, subcutaneous tissue)                                                                                                                                                                |                          |
|                                  |                                                                             | 998.33                                                      | Disruption of traumatic injury wound repair                                                                                                                                               |                          |
|                                  |                                                                             | 998.5                                                       | Postoperative infection                                                                                                                                                                   |                          |
|                                  |                                                                             | 998.51                                                      | Infected postoperative seroma                                                                                                                                                             |                          |
|                                  |                                                                             | 998.59                                                      | Other postoperative infection (e.g. intra-abdominal abscess, septicemia)                                                                                                                  |                          |
|                                  |                                                                             | 54.91                                                       | Percutaneous abdominal drainage                                                                                                                                                           |                          |
| <b>GI Hemorrhage</b>             | <i>Diagnostic</i>                                                           |                                                             | Esophageal hemorrhage (Excludes: 530.82 hemorrhage due to esophageal varices [456.0-456.2])                                                                                               |                          |
|                                  |                                                                             | 531.xx                                                      | Gastric Ulcer, includes 531.x0 (no mention of obstruction) and 531.x1 (with obstruction)                                                                                                  |                          |
|                                  |                                                                             | 531.0x                                                      | Gastric Ulcer, Acute with hemorrhage                                                                                                                                                      |                          |
|                                  |                                                                             | 531.1x                                                      | Gastric Ulcer, Acute with perforation                                                                                                                                                     |                          |
|                                  |                                                                             | 531.2x                                                      | Gastric Ulcer, Acute with hemorrhage and perforation                                                                                                                                      |                          |
|                                  |                                                                             | 531.4x                                                      | Gastric Ulcer, Chronic or unspecified with hemorrhage                                                                                                                                     |                          |
|                                  |                                                                             | 531.6x                                                      | Gastric Ulcer, Chronic or unspecified with hemorrhage and perforation                                                                                                                     |                          |
|                                  |                                                                             |                                                             | Duodenal Ulcer, includes 532.x0 (no mention of obstruction) and 532.x1 (with 532.xx obstruction)                                                                                          |                          |
|                                  |                                                                             | 532.0x                                                      | Duodenal Ulcer, Acute with hemorrhage                                                                                                                                                     |                          |
|                                  |                                                                             | 532.1x                                                      | Duodenal Ulcer, Acute with perforation                                                                                                                                                    |                          |
|                                  |                                                                             | 532.2x                                                      | Duodenal Ulcer, Acute with hemorrhage and perforation                                                                                                                                     |                          |
|                                  |                                                                             | 532.4x                                                      | Duodenal Ulcer, Chronic or unspecified with hemorrhage                                                                                                                                    |                          |
|                                  |                                                                             | 532.6x                                                      | Duodenal Ulcer, Chronic or unspecified with hemorrhage and perforation                                                                                                                    |                          |
|                                  |                                                                             | 533.xx                                                      | Peptic Ulcer, includes 533.x0 (no mention of obstruction) and 533.x1 (with obstruction)                                                                                                   |                          |
|                                  |                                                                             | 533.0x                                                      | Peptic Ulcer, Acute with hemorrhage                                                                                                                                                       |                          |
|                                  |                                                                             | 533.1x                                                      | Peptic Ulcer, Acute with perforation                                                                                                                                                      |                          |
|                                  |                                                                             | 533.2x                                                      | Peptic Ulcer, Acute with hemorrhage and perforation                                                                                                                                       |                          |
|                                  |                                                                             | 533.4x                                                      | Peptic Ulcer, Chronic or unspecified with hemorrhage                                                                                                                                      |                          |
|                                  |                                                                             | 533.6x                                                      | Peptic Ulcer, Chronic or unspecified with hemorrhage and perforation                                                                                                                      |                          |
|                                  |                                                                             |                                                             | Gastrojejunal Ulcer, includes 533.x0 (no mention of obstruction) and 533.x1 (with 534.xx obstruction)                                                                                     |                          |
|                                  |                                                                             | 534.0x                                                      | Gastrojejunal Ulcer, Acute with hemorrhage                                                                                                                                                |                          |
|                                  |                                                                             | 534.1x                                                      | Gastrojejunal Ulcer, Acute with perforation                                                                                                                                               |                          |
|                                  |                                                                             | 534.2x                                                      | Gastrojejunal Ulcer, Acute with hemorrhage and perforation                                                                                                                                |                          |
| 534.4x                           | Gastrojejunal Ulcer, Chronic or unspecified with hemorrhage                 |                                                             |                                                                                                                                                                                           |                          |
| 534.6x                           | Gastrojejunal Ulcer, Chronic or unspecified with hemorrhage and perforation |                                                             |                                                                                                                                                                                           |                          |
| 535.01                           | Acute gastritis with hemorrhage                                             |                                                             |                                                                                                                                                                                           |                          |
| 535.11                           | Atrophic gastritis with hemorrhage                                          |                                                             |                                                                                                                                                                                           |                          |
| 535.21                           | Gastric mucosal hypertrophy with hemorrhage                                 |                                                             |                                                                                                                                                                                           |                          |
| 535.31                           | Alcoholic gastritis with hemorrhage with hemorrhage                         |                                                             |                                                                                                                                                                                           |                          |
| 535.41                           | Other specified gastritis with hemorrhage                                   |                                                             |                                                                                                                                                                                           |                          |
| 535.51                           | Unspecified gastritis and gastroduodenitis with hemorrhage                  |                                                             |                                                                                                                                                                                           |                          |
| 535.61                           | Duodenitis with hemorrhage                                                  |                                                             |                                                                                                                                                                                           |                          |
| 578.9                            | Hemorrhage of gastrointestinal tract, NOS                                   |                                                             |                                                                                                                                                                                           |                          |
